# Supplementary material for: Supramolecular isomorphic dodecanuclear cobalt clusters with the same metal shell but different core ligands
Source: Royal Society of Chemistry journal article supplement (doi:10.1039/d2dt00915c), 2022-01-01
Supplement: d2dt00915c1.pdf [file d2dt00915c1.pdf]

## Supporting Information for

# Supramolecular Isomorphic Dodecanuclear Cobalt Clusters with Same Metal Shell but Different Core Ligands†

Xiao-Wen Liang,<sup>a</sup> Lin-Lin Zhang,<sup>a</sup> Ting zhang,<sup>a</sup> Jiong-Peng Zhao<sup>\*a</sup> and Fu-Chen Liu<sup>\*a</sup>

<sup>a</sup> School of Chemistry and Chemical Engineering, Tianjin University of Technology, Tianjin 300384, P.R. China.

\* Corresponding author. E-mail: zhaojp@tjut.edu.cn, fcliu@tjut.edu.cn.

**Table S1** Selected bond lengths [Å] for **1** and **2**.

| <b>1</b> |           | <b>2</b> |          |
|----------|-----------|----------|----------|
| Co1-O1   | 2.131(9)  | Co1-O1   | 2.048(5) |
| Co1-O7   | 2.031(8)  | Co1-O7   | 2.064(5) |
| Co1-O9   | 2.062(9)  | Co1-O9   | 2.034(5) |
| Co1-O19  | 1.994(9)  | Co1-O19  | 1.994(6) |
| Co1-N30  | 2.083(12) | Co1-N26  | 2.101(6) |
| Co2-O2   | 2.114(9)  | Co2-O2   | 2.209(5) |
| Co2-O9   | 2.071(9)  | Co2-O9   | 2.089(5) |
| Co2-O11  | 2.076(9)  | Co2-O11  | 2.042(5) |
| Co2-N3   | 2.093(11) | Co2-N3   | 2.099(6) |
| Co2-N4   | 2.166(11) | Co2-N4   | 2.123(6) |
| Co2-N28  | 2.124(12) | Co2-N28  | 2.136(7) |
| Co3-O2   | 2.095(9)  | Co3-O2   | 2.029(4) |
| Co3-O11  | 2.061(9)  | Co3-O11  | 2.063(5) |
| Co3-O13  | 2.056(9)  | Co3-O13  | 2.026(5) |
| Co3-N33  | 2.048(11) | Co3-O20  | 1.978(7) |
| Co3-N15  | 2.135(12) | Co3-N15  | 2.141(6) |
| Co3-N26  | 2.108(12) | Co4-O3   | 2.232(5) |
| Co4-O3   | 2.160(9)  | Co4-O13  | 2.116(5) |
| Co4-O13  | 2.127(9)  | Co4-O15  | 2.072(5) |
| Co4-O15  | 2.097(9)  | Co4-N5   | 2.100(7) |
| Co4-N5   | 2.123(11) | Co4-N6   | 2.127(6) |
| Co4-N6   | 2.129(12) | Co4-N17  | 2.134(6) |
| Co4-N17  | 2.152(11) | Co5-O3   | 2.022(5) |
| Co5-O3   | 1.981(9)  | Co5-O15  | 2.046(5) |

---

|          |           |          |          |
|----------|-----------|----------|----------|
| Co5-O15  | 2.037(10) | Co5-O17  | 2.010(5) |
| Co5-O17  | 2.003(8)  | Co5-N19  | 2.093(6) |
| Co5-N19  | 2.071(11) | Co5-N23  | 2.072(6) |
| Co5-N23  | 2.080(11) | Co6-O1   | 2.231(5) |
| Co6-O1   | 2.144(9)  | Co6-O7   | 2.034(5) |
| Co6-O7   | 2.051(9)  | Co6-O17  | 2.103(5) |
| Co6-O17  | 2.086(9)  | Co6-N7   | 2.086(7) |
| Co6-N7   | 2.101(12) | Co6-N8   | 2.152(6) |
| Co6-N8   | 2.162(11) | Co6-N21  | 2.086(6) |
| Co6-N21  | 2.133(12) | Co7-O4   | 2.044(5) |
| Co7-O4   | 2.101(9)  | Co7-O8   | 2.075(5) |
| Co7-O8   | 2.031(10) | Co7-O10  | 2.031(5) |
| Co7-O10  | 2.030(9)  | Co7-O19  | 2.001(6) |
| Co7-O19  | 1.989(10) | Co7-N27  | 2.120(7) |
| Co7-N30  | 2.110(11) | Co8-O5   | 2.217(5) |
| Co8-O5   | 2.127(9)  | Co8-O10  | 2.103(5) |
| Co8-O10  | 2.060(9)  | Co8-O12  | 2.041(5) |
| Co8-O12  | 2.039(9)  | Co8-N9   | 2.137(6) |
| Co8-N9   | 2.134(11) | Co8-N10  | 2.074(7) |
| Co8-N10  | 2.113(12) | Co8-N29  | 2.083(7) |
| Co8-N29  | 2.097(12) | Co9-O5   | 2.029(5) |
| Co9-O5   | 2.090(9)  | Co9-O12  | 2.071(5) |
| Co9-O12  | 2.062(9)  | Co9-O14  | 2.006(5) |
| Co9-O14  | 2.077(9)  | Co9-O21  | 1.999(8) |
| Co9-N35  | 2.101(12) | Co9-N16  | 2.156(6) |
| Co9-N16  | 2.126(12) | Co10-O6  | 2.211(4) |
| Co9-N27  | 2.107(12) | Co10-O14 | 2.099(5) |
| Co10-O6  | 2.167(8)  | Co10-O16 | 2.066(5) |
| Co10-O14 | 2.067(9)  | Co10-N11 | 2.121(6) |
| Co10-O16 | 2.056(9)  | Co10-N12 | 2.118(7) |
| Co10-N11 | 2.105(11) | Co10-N18 | 2.109(7) |
| Co10-N12 | 2.084(12) | Co11-O6  | 2.031(5) |
| Co10-N18 | 2.101(12) | Co11-O16 | 2.040(5) |
| Co11-O6  | 1.991(9)  | Co11-O18 | 1.999(5) |
| Co11-O16 | 2.021(9)  | Co11-N20 | 2.115(5) |
| Co11-O18 | 1.970(10) | Co11-N23 | 2.074(7) |
| Co11-N20 | 2.120(11) | Co12-O4  | 2.219(5) |
| Co11-N23 | 2.128(12) | Co12-O8  | 2.049(5) |
| Co12-O4  | 2.138(9)  | Co12-O18 | 2.124(5) |
| Co12-O8  | 2.050(9)  | Co12-N13 | 2.125(6) |

|          |           |          |          |
|----------|-----------|----------|----------|
| Co12-O18 | 2.121(9)  | Co12-N14 | 2.073(7) |
| Co12-N13 | 2.167(12) | Co12-N22 | 2.080(6) |
| Co12-N14 | 2.061(12) |          |          |
| Co12-N22 | 2.059(11) |          |          |

**Table S2** Selected bond angles [°] for **1** and **2**.

| <b>1</b>      |          | <b>2</b>      |            |
|---------------|----------|---------------|------------|
| Co1-O1-Co6    | 97.2(3)  | Co1-O1-Co6    | 99.00(18)  |
| Co3-O2-Co2    | 98.8(4)  | Co3-O2-Co2    | 98.84(19)  |
| Co5-O3-Co4    | 104.5(4) | Co5-O3-Co4    | 101.67(18) |
| Co7-O4-Co12   | 99.0(3)  | Co7-O4-Co12   | 100.00(18) |
| Co9-O5-Co8    | 98.4(4)  | Co9-O5-Co8    | 99.14(19)  |
| Co11-O6-Co10  | 104.2(4) | Co11-O6-Co10  | 101.85(19) |
| Co1-O7-Co6    | 103.5(4) | Co6-O7-Co1    | 105.2(2)   |
| Co7-O8-Co12   | 104.4(4) | Co12-O8-Co7   | 104.8(2)   |
| Co1-O9-Co2    | 109.2(4) | Co1-O9-Co2    | 108.6(2)   |
| Co7-O10-Co8   | 111.5(4) | Co7-O10-Co8   | 108.6(2)   |
| Co3-O11-Co2   | 101.2(4) | Co2-O11-Co3   | 103.4(2)   |
| Co8-O12-Co9   | 102.2(4) | Co8-O12-Co9   | 103.7(2)   |
| Co3-O13-Co4   | 106.4(4) | Co3-O13-Co4   | 106.9(2)   |
| Co9-O14-Co10  | 106.9(4) | Co9-O14-Co10  | 106.7(2)   |
| Co5-O15-Co4   | 104.8(4) | Co5-O15-Co4   | 106.6(2)   |
| Co11-O16-Co10 | 107.2(4) | Co11-O16-Co10 | 106.7(2)   |
| Co5-O17-Co6   | 109.6(4) | Co5-O17-Co6   | 109.1(2)   |
| Co11-O18-Co12 | 108.5(4) | Co11-O18-Co12 | 108.5(2)   |
| Co1-O19-Co7   | 114.7(5) | Co1-O19-Co7   | 123.5(3)   |
| Co5-N23-Co11  | 123.3(5) | Co11-N23-Co5  | 124.5(3)   |
| Co1-N30-Co7   | 106.2(5) |               |            |

**Table S3** Bond valence calculations for **1** and **2** with  $S = \exp[(r_0 - r) / B]$ ,  $r_0 = 1.680 \text{ \AA}$  for Co-O and  $1.790 \text{ \AA}$  for Co-N,  $B = 0.37$  and  $r$  is the Co-O/N bond lengths<sup>1</sup>.

|          | Co1  | Co2  | Co3  | Co4  | Co5  | Co6  | Co7  | Co8  | Co9  | Co10 | Co11 | Co12 |
|----------|------|------|------|------|------|------|------|------|------|------|------|------|
| <b>1</b> | 1.96 | 2.24 | 2.4  | 2.11 | 2.19 | 2.20 | 2.10 | 2.34 | 2.34 | 2.28 | 2.11 | 2.31 |
| <b>2</b> | 1.99 | 2.18 | 1.97 | 2.10 | 2.10 | 2.19 | 2.01 | 2.21 | 1.95 | 2.16 | 2.07 | 2.22 |

1. (a) W. Liu and H. H. Thorp, *Inorg. Chem.*, 1993, **32**, 4102-4105. (b) N. E. Brese and M. O'Keeffe, *Acta Cryst.*, 1991, **B47**, 192-197. (c) G. J. Palenik, *Inorg. Chem.*, 1997, **36**, 122.

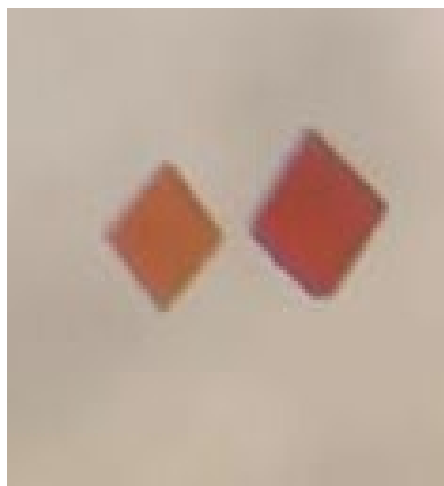

**Fig. S1** The morphology of crystal of **1** (left) and **2** (right) under the microscope.

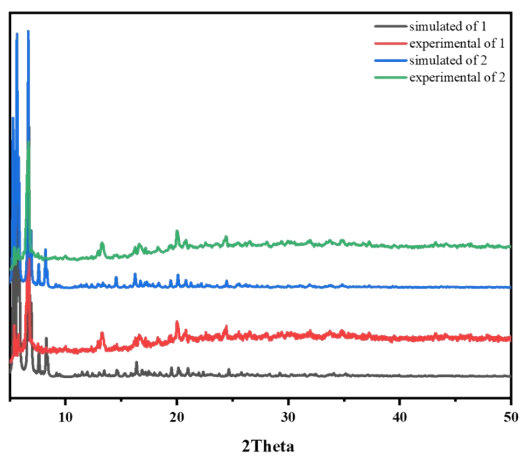

**Fig. S2** Powder X-ray diffraction pattern of **1** and **2**.

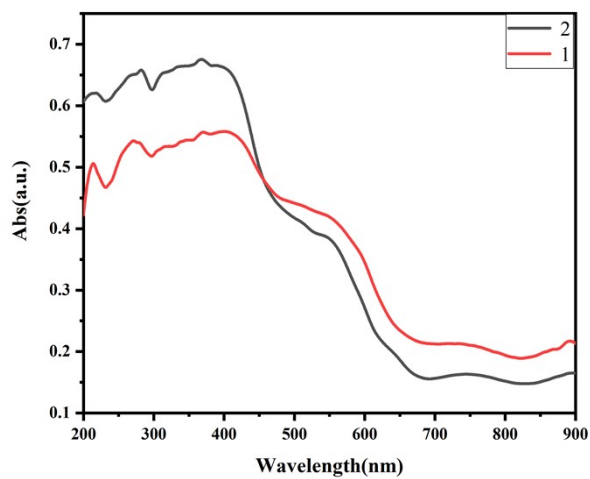

**Fig. S3** The UV-vis spectra of **1** and **2**.
